# Supplementary material for: A Colorectal Cancer Susceptibility New Variant at 4q26 in the Spanish Population Identified by Genome-Wide Association Analysis
Source: PubMed Central journal article supplement (PMC4076321; doi:10.1371/journal.pone.0101178), 2014-06-30

Chi-square Q-Q Plot of A2

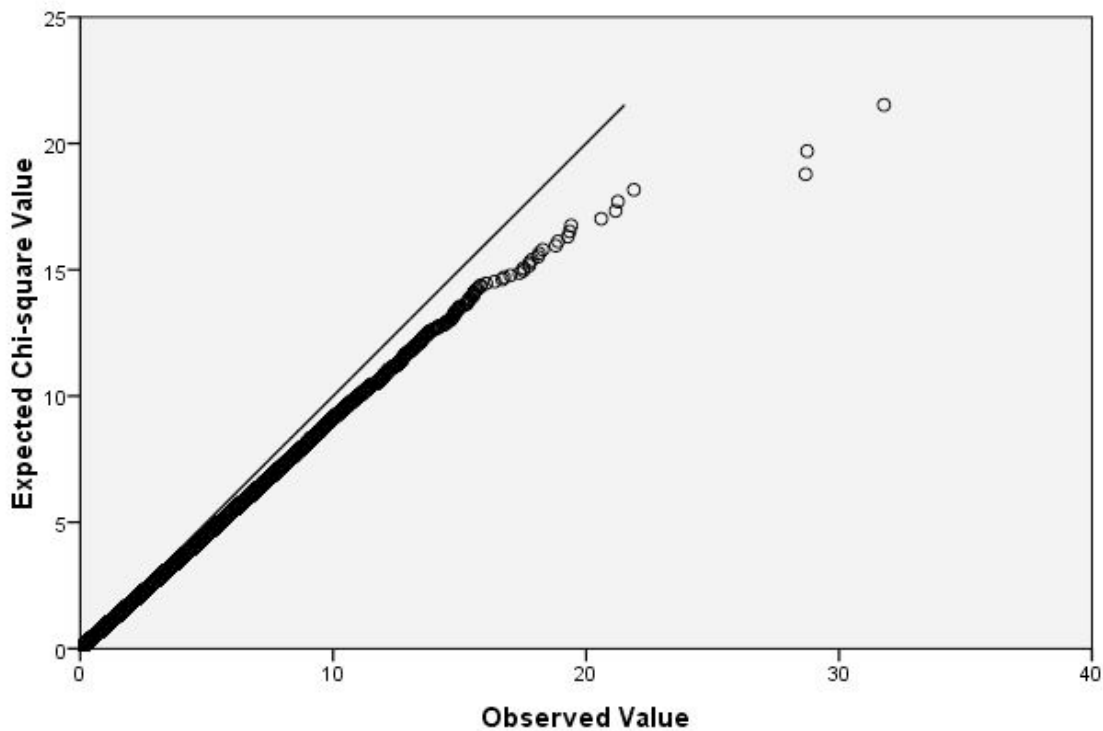

Supplement: pone.0101178.s002.pdf [file pone.0101178.s002.pdf]
